# Spatial Attention Enhances the Neural Representation of Invisible Signals Embedded in Noise

Cooper A. Smout\*<sup>1</sup> and Jason B. Mattingley<sup>1,2</sup>

<sup>1</sup> Queensland Brain Institute, University of Queensland, Brisbane, QLD 4067 Australia

<sup>2</sup> School of Psychology, University of Queensland, Brisbane, QLD 4067 Australia

\* corresponding author: c.smout@uq.edu.au

This research was supported by the Australian Research Council (ARC) Centre of Excellence for Integrative Brain Function (ARC Grant CE140100007). J.B.M. was supported by an ARC Australian Laureate Fellowship (FL110100103).

The authors declare no competing financial interests.

## Abstract

1  
2 Recent evidence suggests that voluntary spatial attention can modulate neural  
3 representations of visual stimuli that do not enter conscious awareness (i.e. invisible  
4 stimuli), supporting the notion that attention and awareness are dissociable processes  
5 (Watanabe et al., 2011; Wyart et al., 2012a). It remains unclear, however, whether spatial  
6 attention can modulate neural representations of invisible stimuli that are in direct  
7 competition with highly salient and visible stimuli. Here we developed a novel  
8 electroencephalography (EEG) frequency-tagging paradigm to obtain a continuous  
9 readout of neural activity associated with visible and invisible signals embedded in  
10 dynamic noise. Participants ( $N = 23$ ) detected occasional contrast changes in one of two  
11 flickering image streams on either side of fixation. Each image stream contained a visible  
12 or invisible signal embedded in every second noise image, the visibility of which was  
13 titrated and checked using a two-interval forced-choice detection task. Steady-state visual-  
14 evoked potentials (SSVEPs) were computed from EEG data at the signal and noise  
15 frequencies of interest. Cluster-based permutation analyses revealed significant neural  
16 responses to both visible and invisible signals across posterior scalp electrodes. In line with  
17 previous findings, spatial attention increased the neural representation of visible signals.  
18 Crucially, spatial attention also increased the neural representation of invisible signals. As  
19 such, the present results replicate and extend previous studies by demonstrating that  
20 attention can modulate the neural representation of invisible signals that are in direct  
21 competition with highly salient masking stimuli.

22

## Significance Statement

23

24

25

26

27

28

29

30

31

32

There has been much debate about the extent to which attention can effect neural representations of stimuli that do not enter conscious awareness. It remains unclear, however, whether spatial attention can modulate representations of invisible stimuli that are in direct spatial and temporal competition with salient masking stimuli. We developed a novel paradigm that for the first time allowed us to measure weak neural representations of invisible stimuli embedded in spatially coincident noise, and tested the effect of spatial attention on these representations. We found that spatial attention enhanced the neural representation of invisible stimuli, demonstrating that competition with highly salient stimuli does not suppress the effects of spatial attention on weak neural representations of invisible stimuli.

33

## Introduction

34

35

36

37

38

39

40

41

42

43

44

45

46

47

48

49

50

51

52

53

When viewing a cluttered visual scene, representations of the various objects compete for limited neural resources (Broadbent, 1958; Desimone and Duncan, 1995). Such ongoing neural competition can be biased by top-down mechanisms to facilitate the observer's behavioural goals (Beck and Kastner, 2009). For example, voluntarily allocating covert spatial attention to a specific region of the visual field can selectively boost neural representations of salient stimuli within that region (Hillyard and Anllo-Vento, 1998; Müller et al., 1998; Martinez et al., 1999). Recent evidence suggests that spatial attention can also enhance neural representations of weak stimuli that do not enter awareness (equated here with the contents of conscious experience; Schurger et al., 2008; Wyart and Tallon-Baudry, 2008; Watanabe et al., 2011; Wyart et al., 2012a). Since these attention effects occurred without a corresponding increase in object awareness, the above studies contradict the classic view that attention and awareness are identical processes (Prinz, 2012). Instead, attention and awareness are increasingly viewed as dissociable mechanisms (Koch and Tsuchiya, 2012; Tallon-Baudry, 2012), but the nature of their intricate relationship remains to be fully characterised. In particular, no study to date has investigated whether spatial attention can modulate neural representations of invisible signals that are in direct competition with visible stimuli, such as when signals are presented concurrently with, and at the same location as, highly salient masking noise. Such research is necessary if we are to understand how top-down mechanisms in the visual system allocate limited resources to competing stimuli with different levels of bottom-up signal strength (i.e. salience). Here we used electroencephalography (EEG) to determine whether voluntary covert

54 spatial attention modulates neural representations of invisible stimuli embedded in highly  
55 salient noise.

56 To investigate this question, it is necessary to disambiguate relatively weak neural activity  
57 arising from subjectively invisible targets from the stronger responses associated with highly  
58 salient and spatially coincident masking stimuli. To date, however, no such technique has been  
59 devised to effectively distinguish the neural signatures of these weak and strong sensory inputs.  
60 If a train of stimuli is presented at a fixed frequency, however, a stable oscillatory response is  
61 produced in the brain that can be observed in the frequency-domain in EEG recordings (the  
62 steady-state visual-evoked potential; SSVEP; Regan, 1966). Multiple stimuli in a visual scene  
63 can thus be ‘frequency tagged’ when flickered at unique frequencies, an approach that has  
64 proven useful for exploring the effects of attention on visible stimuli at separate spatial  
65 locations (Norcia et al., 2015). This technique has recently been developed for frequency-  
66 tagging multiple stimuli at the *same* location (Ales et al., 2012), which could help address the  
67 question of whether spatial attention can modulate neural representations of invisible stimuli  
68 embedded in salient noise.

69 Here we developed a novel EEG frequency-tagging paradigm to obtain a continuous readout  
70 of neural activity associated with visible and invisible signals embedded in dynamic noise.  
71 Participants directed attention to one of a pair of flickering image streams to detect occasional  
72 contrast changes, and we assessed the effect of spatial attention on neural representations of  
73 both visible and invisible signals. We employed a two-interval, forced-choice signal detection  
74 task to confirm that appropriate levels of signal coherence were selected for visible and  
75 invisible signals. To anticipate, we found that spatial attention enhanced neural representations  
76 of both visible and invisible signals, suggesting that attention can bias neural activity in favour  
77 of invisible stimuli that are in spatial and temporal competition with highly salient masking  
78 noise.

## 79 **Materials and Methods**

### 80 *Participants*

81 Twenty-three healthy participants (11 female, mean age: 22.65 years) with normal or corrected-  
82 to-normal vision were recruited via an online research participation scheme at The University  
83 of Queensland. Participants completed a safety-screening questionnaire and provided written

84 consent prior to commencement of the study, which was approved by The University of  
85 Queensland Human Research Ethics Committee.

### 86 *Stimuli and apparatus*

87 The method of stimulus generation (*Figure 1*) was adapted from Ales, Farzin, Rossion and  
88 Norcia (2012) to maintain the same average power distribution and luminance across all  
89 images. All images were created from the same seed image consisting of an annulus (seven  
90 cycles, inner diameter: 4.67° of visual angle, outer diameter: 14° of visual angle) on a uniform  
91 mid-grey square background (14° of visual angle). The phase distribution of the seed image  
92 was randomised separately for each image used in the experiment, and recombined with the  
93 original amplitude distribution to create a noise background. The annulus and noise  
94 background were then combined using complementary spatial blending masks (which spanned  
95 from the annulus edges to 2° of visual angle within each edge) to create an exemplar image  
96 consisting of a fully coherent annulus on a random noise background. Finally, the exemplar  
97 phase distribution was randomized according to the trial sequence (partially for a signal image;  
98 fully for a noise image), and recombined with the exemplar amplitude distribution. Phase  
99 angles of the exemplar were linearly interpolated in the direction of least difference to maintain  
100 a uniform phase distribution (for more information, see Ales, Farzin, & Norcia, 2012).

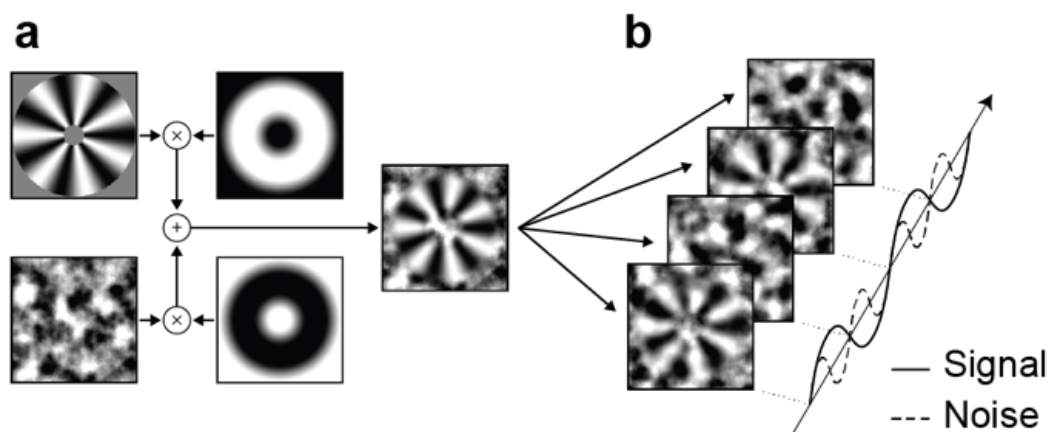

101  
102 **Figure 1.** Stimulus generation and typical image sequence. (A) Phase distribution of the signal  
103 (annulus, top left) was scrambled to create a noise background that was different for every image  
104 (bottom left). Signal and noise images were combined via inverse masks to create an exemplar image  
105 (right), which was then phase-scrambled according to the desired level of signal coherence (i.e. *noise*,  
106 *invisible signal*, or *visible signal*). (B) Flickering images at a steady rate produced a neural response  
107 to the dynamic noise (which changed on every image) at the frequency of stimulation (10 or 15 Hz;  
108 the *noise SSVEP*). Crucially, signal (annulus) was embedded in every second image, which elicited a  
109 neural response at half the frequency of the noise SSVEP (i.e. 5 or 7.5 Hz; the *signal SSVEP*).

110 Stimuli were presented on a 21-inch CRT monitor (NEC, Accusync 120) with a screen  
111 resolution of 800 x 600 pixels and a refresh rate of 120 Hz, using the Cogent 2000 Toolbox  
112 (<http://www.vislab.ucl.ac.uk/cogent.php>) for Matlab (The Mathworks Inc., Natick, USA)  
113 running under Windows XP. Participants were seated in a comfortable armchair in an  
114 electrically shielded laboratory, with the head supported by a chin rest at a viewing distance of  
115 57cm.

## 116 *Procedures*

117 The present study used a within-participant design with two levels of target awareness (*visible*,  
118 *invisible*) and two levels of spatial attention (*attended*, *ignored*). Two tasks with similar overall  
119 designs were employed to manipulate awareness and spatial attention.

120 *Awareness Task.* Participants were presented with two square image streams on either side of  
121 fixation (visual angle: 14°), as illustrated in *Figure 2* and *Movie 1*. Each image stream  
122 contained two consecutive intervals that consisted of 0.5 s of static noise followed by 2.4 s of  
123 dynamic flickering noise. One of the two intervals in each stream (randomized separately) also  
124 contained signal (an annulus) embedded in every second noise image, the coherence of which  
125 increased linearly over the initial 0.4 s (to reduce involuntary capture of attention). Participants  
126 were asked to maintain fixation and report, on the cued side, which of the two intervals  
127 contained a signal (two-interval forced-choice), while ignoring the non-cued side. The cue  
128 direction (left or right) was randomized for the first trial of each block and then alternated every  
129 eight trials.

130 Participants completed two versions of the Awareness Task. The first version was run at the  
131 beginning of the experiment (following practice with accuracy feedback), in order to set signal  
132 coherence levels for the subsequent Attention Task (see below). In this first version,  
133 participants completed 48 trials with feedback, while levels of signal coherence were adjusted  
134 according to an adaptive Quest staircase (Watson & Pelli, 1983) designed to approximate the  
135 maximum level of signal coherence that could not be detected by each participant (i.e. the  
136 invisible condition). Signal coherence for the visible condition was then set 40% higher than  
137 this level, as guided by psychometric functions fitted to pilot data. The second version of the  
138 Awareness Task was run at the end of the experiment, to verify that appropriate levels of signal  
139 coherence had been selected. In this version, participants completed two blocks of 64 trials

140 (without feedback) with each image stream containing visible *or* invisible signal in one of the  
141 two consecutive intervals (randomized separately across trials).

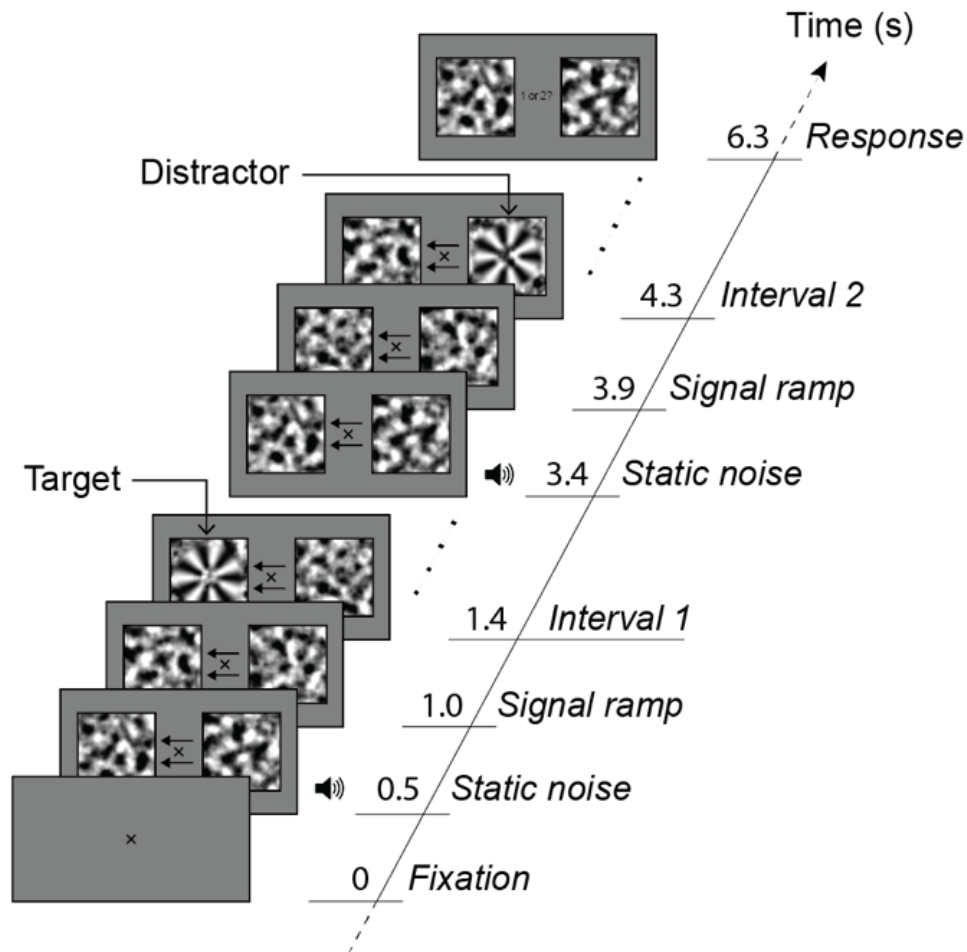

142

143 **Figure 2.** Awareness Task. Participants fixated centrally and searched for a signal embedded in  
144 dynamic noise on the cued side, which appeared in only one of two consecutive intervals. In the  
145 example shown, a target is present during interval 1 on the cued (left) side. Note that a distractor  
146 signal is also present during interval 2 on the ignored (right) side. Images flickered during the ramping  
147 and signal intervals only (see *Figure 1b* for typical image sequence).

148 *Attention Task.* Participants were again presented with two image streams on either side of  
149 fixation, which began flickering after 0.5 s of static noise (*Figure 3; Movie 2*). Unlike in the  
150 Awareness Task, however, only one flickering interval of 10.4 s duration was presented in each  
151 trial, and both image streams contained either a visible or an invisible signal (as per the staircase  
152 procedure above) embedded in every second noise image. Additionally, each image stream  
153 occasionally decreased in contrast before returning to normal across a 1 s period (ramping on  
154 and off linearly), with at least 1.5 s between peaks of contrast decreases (in either stream).  
155 Participants were asked to maintain fixation and report at the end of the trial how many contrast

156 decreases (*targets*) occurred in the cued (*attended*) image stream. When the attended stream  
157 contained two contrast targets, the second target peaked between 7 s and 8.5 s into the trial, to  
158 encourage sustained attention throughout trials. Participants were allowed to practice the task  
159 (with feedback after each trial) before completing eight blocks of 64 test trials, with feedback  
160 provided between blocks. The percentage of contrast decrease was adjusted between blocks to  
161 maintain an approximate detection level of 65% (according to a 1 up 2 down staircase with  
162 step sizes of 5%).

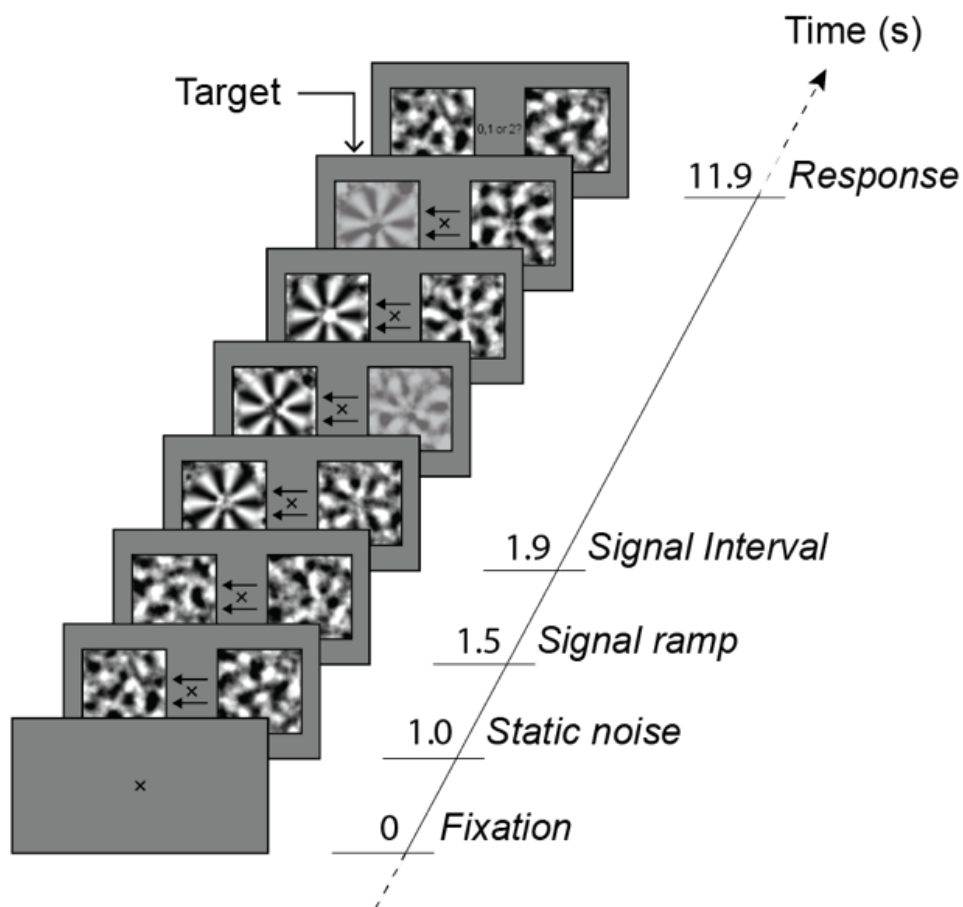

163

164 **Figure 3.** Attention Task. Participants fixated centrally and counted the number (0, 1 or 2) of brief  
165 decreases in contrast in the cued (*attended*) image stream. In the example shown, one contrast  
166 decrease appeared in each of the attended (*left*) and ignored (*right*) image streams. Each image  
167 stream contained a visible or invisible annulus embedded in dynamic noise throughout the entire  
168 signal interval. Note that for illustrative purposes the magnitude of the contrast decrements has been  
169 enhanced in the figure.

170 *Stimulation frequencies.* During both tasks, noise images in each image stream (i.e. attended  
171 and ignored) flickered at distinct frequencies (10 or 15 Hz, counterbalanced across trials),  
172 eliciting SSVEP responses at the frequency of noise stimulation (the *noise frequency*).  
173 Crucially, since signal (a partially scrambled annulus, as described above) was embedded in

174 every second noise image (during signal intervals), a separate SSVEP was elicited at half the  
175 noise frequency in response to signal (5 or 7.5 Hz, the *signal frequency*; *Figure 1*). Thus we  
176 were able to isolate neural responses to both noise and signal (at two levels of awareness),  
177 when those stimuli were either attended or ignored (see Results for details of power  
178 computation).

### 179 *EEG recording*

180 Participants were fitted with a 64 Ag-AgCl electrode EEG system (BioSemi Active Two:  
181 Amsterdam, Netherlands) after the initial Awareness Task, and EEG data were recorded during  
182 the Attention Task and final Awareness Task. Continuous data were recorded using BioSemi  
183 ActiView software (<http://www.biosemi.com>), and were digitized at a sample rate of 1024 Hz  
184 with 24-bit A/D conversion and a .01 – 208 Hz amplifier band pass. All scalp channels were  
185 referenced to the standard BioSemi reference electrodes, and electrode offsets were adjusted  
186 to be below 25  $\mu$ V before beginning the recording. Horizontal and vertical eye movements  
187 were recorded via pairs of BioSemi flat Ag-AgCl electro-oculographic electrodes placed to the  
188 outside of each eye, and above and below the left eye, and respectively.

### 189 *EEG data pre-processing*

190 Electroencephalography (EEG) recordings were processed offline using the Fieldtrip toolbox  
191 in Matlab (<http://fieldtrip.fcdonders.nl>). Trials containing horizontal eye movements were  
192 inspected manually and rejected if lateral eye fixations exceeded 1 s during the Attention Task  
193 (3.55% of trials) or 150ms during the final Awareness Task (12% of trials). Two faulty  
194 electrodes (across two participants) were interpolated using the nearest neighboring electrodes.  
195 Scalp electrode data were re-referenced to the average of all 64 electrodes, resampled to 256  
196 Hz, and subjected to a surface Laplacian filter to control for volume conduction (Cohen, 2014).  
197 Trials were epoched into intervals containing signal at full coherence (Awareness Task: 1.4 –  
198 3.4 s or 4.3 – 6.3 s, *Figure 2*; Attention Task: 1.9 s – 11.9 s, *Figure 3*), for frequency power  
199 analyses (see Results). Attention Task trials were also epoched with an additional 2 s before  
200 and after each signal period for time-frequency power analyses.

## 201 **Results**

### 202 *Awareness Task*

203 The initial adaptive staircase procedure produced an average signal coherence of 29.91% (SD:  
204 3.18%) for the invisible condition and 69.91% (SD: 3.18%) for the visible condition. One-



205 tailed t-tests were used to assess signal awareness in the final Awareness Task, which revealed  
206 that visible targets were detected well above chance level (50%; mean = 95.77%, SEM = .76,  
207  $t_{(22)} = 60.37, p < .001$ ) but below ceiling (100%;  $t_{(22)} = -5.57, p < .001$ ), and detection of invisible  
208 targets was no better than chance (mean = 50.96%, SEM = 1.70,  $t_{(22)} = .57, p = .289$ ).  
209 Furthermore, Bayesian statistics supported the null hypothesis that invisible stimuli were  
210 detected at chance (uniform prior, lower bound = 50%, upper bound = 100%,  $B = .07$ ).

### 211 *Attention Task*

212 One-tailed t-tests revealed that contrast decrement targets were detected better than chance  
213 level (33%; mean = 66.69%, SEM = 1.34,  $t_{(22)} = 49.50, p < .001$ ) but below ceiling level (100%;  
214  $t_{(22)} = -24.85, p < .001$ ). The behavioural results thus demonstrate that the Attention Task was  
215 sufficiently hard to require attention, without being too difficult.

### 216 *Noise and Signal Elicit Distinct Neural Responses*

217 To measure neural responses to the flickering stimuli during Attention Task epochs, we  
218 examined *phase-locked power* at each of the noise (10 and 15 Hz) and signal (5 and 7.5 Hz)  
219 stimulation frequencies, which was calculated as the difference between the *total power* and  
220 *non-phase-locked power* (for a detailed discussion, see Cohen, 2014). Total power was  
221 computed with Fourier transforms of individual epochs and averaged across trials within each  
222 condition (attention, awareness, stimulation frequency and side), and normalized to the average  
223 power (across all epochs) in the pre-stimulus period (0.2 – 1.0 s). Non-phase-locked power was  
224 calculated in the same manner as total power, after the condition-average event-related  
225 potential had been subtracted from each trial (Cohen, 2014). Phase-locked power was then  
226 calculated by subtracting the non-phase-locked power from the total power within conditions.  
227 *Figure 4* shows the phase-locked power (hereafter referred to as *power*) at electrode POz as a  
228 function of frequency, averaged across all Attention Task epochs. Note that power is only  
229 greater than zero at the signal (5 and 7.5 Hz) and noise (10 and 15 Hz) frequencies, confirming  
230 that the measure successfully isolated neural responses to the flickering stimuli.

231 For all subsequent analyses, we contralateralized electrodes in trials with right-sided  
232 stimulation (i.e., stimuli on the right of fixation flickered at the measured frequency), such that  
233 left-sided (right-sided) electrodes were those ipsilateral (contralateral) to stimulation. Since  
234 neither stimulation frequency or side were conditions of interest, we collapsed across these  
235 factors within levels of attention and awareness.

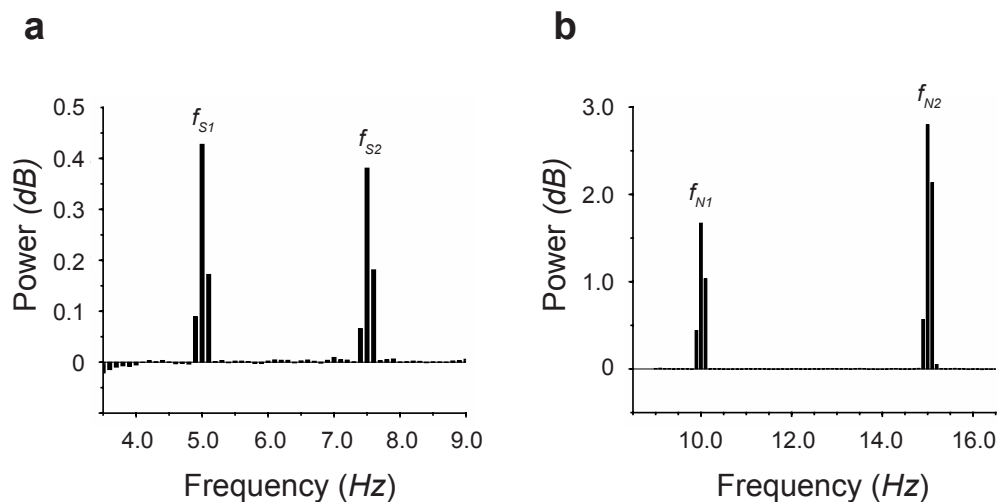

236

237 Figure 4. Phase-locked normalized power at electrode POz, averaged across all trials in the Attention  
238 Task. (a) Signal frequencies (5 and 7.5 Hz). (b) Noise frequencies (10 and 15 Hz).

### 239 *Spatial Attention Enhances Neural Representations of Noise*

240 To verify that attention was sustained covertly to the left or right side image stream across  
241 Attention Task epochs, we also calculated noise frequency power as a function of time.  
242 Preprocessed EEG data were bandpass filtered at each frequency of interest (width: .2 Hz,  
243 order: 64 samples, Matlab function: fir1), subjected to a Hilbert transform, and down-sampled  
244 to 40 Hz. Time-frequency power was then calculated as per phase-locked power (above), with  
245 the exception that a shorter baseline period was used to account for reduced temporal precision  
246 following Hilbert transforms (.3 to .7 s). Power was collapsed across awareness conditions  
247 (since all stimuli contained noise) and subjected to a one-tailed Monte-Carlo permutation test  
248 in *Fieldtrip* (between participant factors: electrode power and time, cluster  $p < .05$ , unit  $p <$   
249  $.05$ , 1000 permutations; for a detailed discussion, see Maris & Oostenveld, 2007). As revealed  
250 in *Figure 5*, spatial attention enhanced noise frequency power across a cluster of posterior and  
251 contralateral electrodes that spanned the entire epoch (Monte-Carlo  $t = 13110$ ,  $p < .001$ ,  
252 corrected for multiple comparisons in space and time).

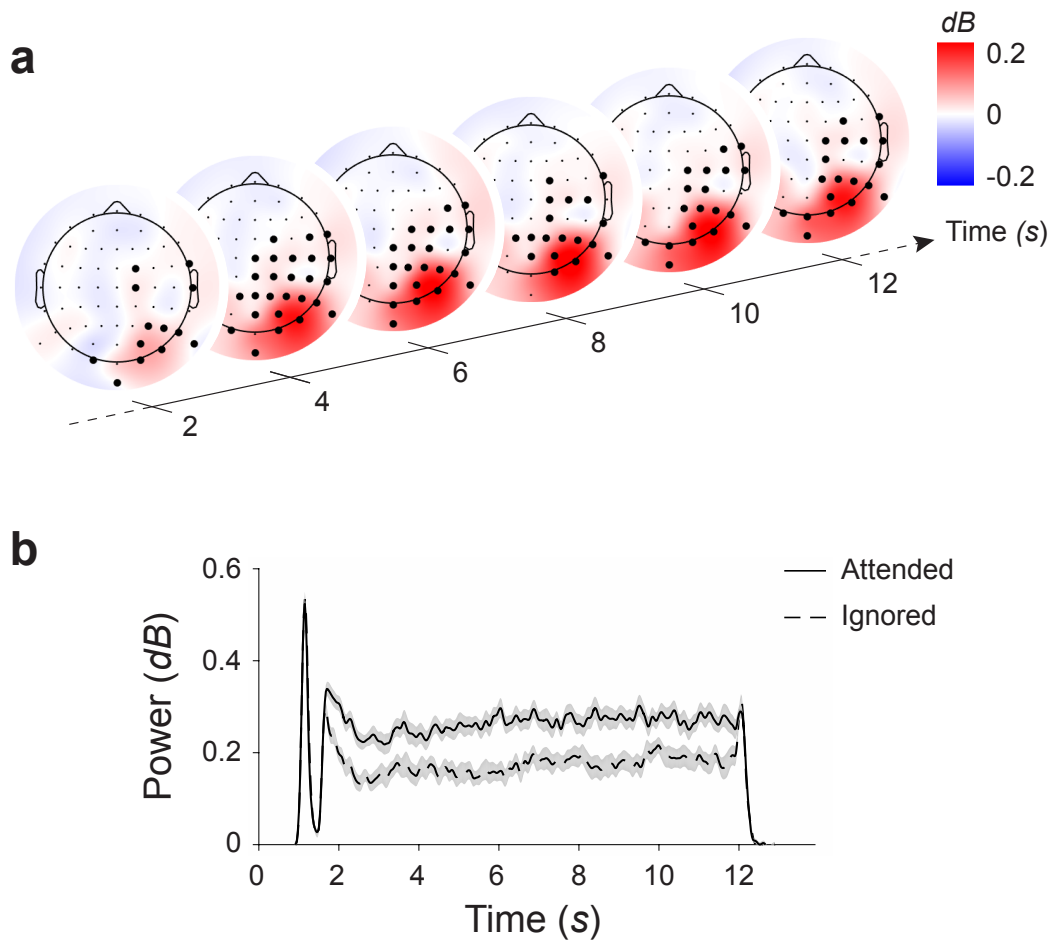

253

254 **Figure 5.** Effect of spatial attention on the neural response to noise in the Attention Task. (a)  
255 Electrode topographies represent the difference between attended and ignored noise SSVEPs,  
256 contralateralized to represent left side stimulation, and collapsed across noise frequencies (10 and 15  
257 Hz). Larger dots indicate the cluster of electrodes that showed significantly greater noise frequency  
258 power with attention over time (cluster-based permutation test, Monte-Carlo  $p < .001$ ). (b) Phase-  
259 locked normalised power averaged across contralateral electrodes P1/P2, PO3/PO4, and PO7/PO8.  
260 Shaded regions indicate the standard error of the mean (within-subjects).

### 261 *Target Detection Correlates with Neural Representations of Noise*

262 To investigate the relationship between neural representations of noise stimuli and behavioural  
263 performance on the Attention Task, we calculated noise frequency power (as above) after  
264 balancing the number of each participant's correct and incorrect trials within each combination  
265 of noise frequency and side (in the attended image stream only, since ignored stimuli were not  
266 responded to). Power during correct and incorrect trials was then subjected to a two-tailed  
267 Monte-Carlo permutation test (between participant factor: electrode power, cluster  $p < .05$ , unit  
268  $p < .05$ , 1000 permutations). As can be seen in *Figure 6*, there was a larger neural response to  
269 noise stimuli across frontal and central electrodes when targets (contrast decrements) were  
270 correctly detected (Monte-Carlo  $t = 28.34$ ,  $p < .001$ , corrected for multiple comparisons in

271 space). This finding suggests that more reliable allocation of attention to the cued image stream  
272 (indexed by enhanced responses to noise stimuli) resulted in improved detection of targets.  
273 Additionally, the finding that target detection was associated with greater neural responses to  
274 noise at frontal and central electrodes, rather than posterior electrodes, might indicate greater  
275 involvement of frontal control mechanisms in the process of target detection (Ridderinkhof,  
276 2004), or that target detection depended on forward propagation of neural responses to anterior  
277 regions of the visual cortex.

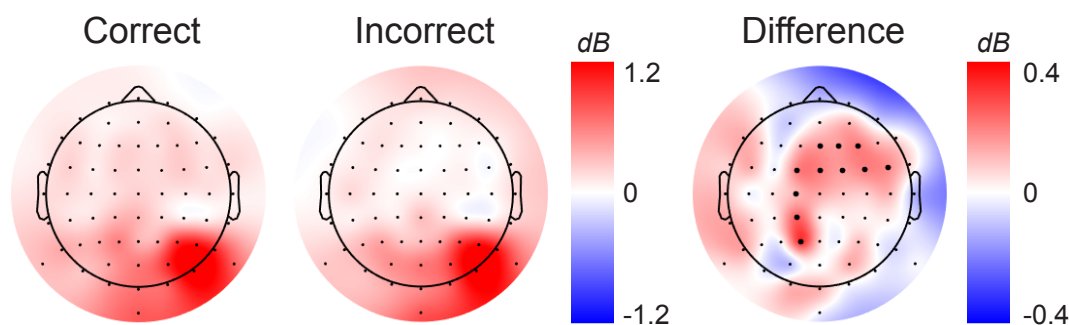

278  
279 **Figure 6.** Relationship between target detection and the neural response to noise in the Attention  
280 Task. Electrode topographies are contralateralized to represent left side stimulation, and collapsed  
281 across noise frequencies (10 and 15 Hz). Larger dots indicate the cluster of electrodes with  
282 significantly greater power on correct trials than incorrect trials (cluster-based permutation test,  
283 Monte-Carlo  $p < .001$ ).

#### 284 *Invisible Signals Elicit Reliable Frequency Responses*

285 A central goal of our study was to demonstrate that invisible (and visible) signals elicit reliable  
286 SSVEPs. To do this we calculated power at the signal frequencies (5 and 7.5 Hz) and collapsed  
287 across frequencies, contralateralized sides, and attention conditions. We then compared the  
288 electrode distributions to a zero power electrode distribution with a one-tailed Monte-Carlo  
289 permutation test in *Fieldtrip* (between participant factor: electrode power, cluster  $p < .05$ , unit  
290  $p < .05$ , 1000 permutations) (Maris and Oostenveld, 2007), separately for each level of  
291 awareness. As revealed in *Figure 7*, signal frequency power during presentation of a visible  
292 signal was significantly greater than zero across a broad posterior and mostly contralateral  
293 cluster of electrodes (Monte-Carlo  $t = 115.67$ ,  $p < .001$ , corrected for multiple comparisons in  
294 space), confirming the presence of a neural response to visible signals. Crucially, signal  
295 frequency power during presentation of invisible signals was also significantly greater than  
296 zero across a cluster of posterior and mostly contralateral electrodes (Monte-Carlo  $t = 17.51$ ,  $p$

297 = .009, corrected for multiple comparisons in space), confirming the presence of a neural  
298 response to invisible signals.

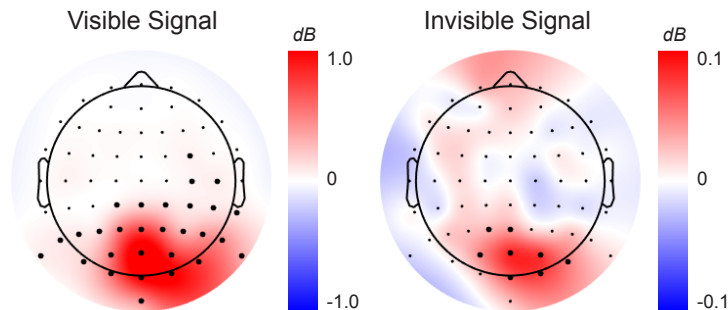

299

300 **Figure 7.** Neural response to visible and invisible signals in the Attention Task. Electrode  
301 topographies represent SSVEP power in response to visible signals (left) and invisible signals (right),  
302 contralateralized to represent left side stimulation, and collapsed across attention conditions and  
303 signal frequencies (5 and 7.5 Hz). Larger dots indicate clusters of electrodes with significant signal  
304 relative to a zero power topography map (cluster-based permutation test, Monte-Carlo  $p < .05$ ).

### 305 *Signal Frequency Responses Are Not Driven by Noise Stimuli*

306 As a control, we checked whether the neural activity observed at signal frequencies might  
307 reflect a neural response to noise stimuli at half the frequency of stimulation. To do this we  
308 computed signal frequency power during intervals in the Awareness Task that contained only  
309 noise (i.e., without signal embedded in the contralateral image stream of interest). We  
310 normalised interval power to adjacent frequency bands ( $\pm 0.5$ , 1.0, and 1.5 Hz), since the pre-  
311 stimulus period was too brief to use as a baseline. Intervals containing only noise (at the signal  
312 frequency of interest) were collapsed across the cluster of electrodes showing a significant  
313 response to invisible stimuli in the Attention Task (Pz, POz, Oz, PO3, PO4, contralateral  
314 PO7/PO8, contralateral O1/O2, and ipsilateral P1/P2; see *Figure 7*). A one-tailed t-test  
315 demonstrated that signal frequency power during noise stimulation in the Awareness Task was  
316 not significantly greater than zero (mean  $< .01$  dB,  $p = .465$ ). Bayesian statistics supported the  
317 null hypothesis that noise stimuli produced no neural response at signal frequencies (uniform  
318 prior, lower bound = 0, upper bound = .06 dB,  $B = .17$ ). Together, these results confirm that  
319 the observed neural activity at signal frequencies in the Attention Task was driven by signal  
320 stimuli.

321 *Attention Enhances Neural Representations of Visible and Invisible Signals*

322 Considering the weaker neural response to signals compared with high-contrast noise (*Figure*  
323 *4*), we collapsed power across posterior and contralateral clusters of electrodes that showed a  
324 significant response to the signal (*Figure 7*), separately for each level of awareness and  
325 attention. As revealed in *Figure 8*, attention increased the neural response to both visible and  
326 invisible signals across these electrode clusters. A two-way analysis of variance tested the  
327 effects of signal awareness (two levels: *visible*, *invisible*) and spatial attention (two levels:  
328 *attended*, *ignored*) on neural responses to signal. Results of the ANOVA revealed a main effect  
329 of signal awareness ( $F_{(1,22)} = 46.457, p < .001, \eta_p^2 = .68$ ), with greater neural responses to  
330 visible signals (.37 dB) than to invisible signals (0.06 dB). Spatial attention also increased  
331 neural responses to stimuli ( $F_{(1,22)} = 7.600, p = .012, \eta_p^2 = .26$ ), with significantly greater signal  
332 frequency power in response to attended signals (0.25 dB) than ignored signals (0.18 dB). The  
333 interaction between signal awareness and spatial attention was also significant ( $F_{(1,22)} = 4.780,$   
334  $p = .040, \eta_p^2 = .18$ ).

335 Follow-up two-tailed t-tests assessed the simple main effects of spatial attention at each level  
336 of signal awareness (*Figure 8b*). Spatial attention modulated neural responses to visible signals,  
337 with greater activation in response to attended (mean = .43 dB) than ignored visible stimuli  
338 (mean = .31 dB, within-participants SEM = .03,  $t_{(22)} = 2.69, p = .013$ ) This finding is in line  
339 with previous research showing attentional enhancement of SSVEPs to visible flickering  
340 stimuli (Vialatte, Maurice, Dauwels, & Cichocki, 2010). Crucially, spatial attention also  
341 modulated neural responses to invisible signals, with significantly greater activation in  
342 response to attended (mean = .08 dB) than to ignored invisible stimuli (mean = .04 dB, within-  
343 participants SEM = .01,  $t_{(22)} = 2.08, p = .049$ ), indicating that attention can also enhance neural  
344 responses to invisible stimuli embedded in highly salient noise.

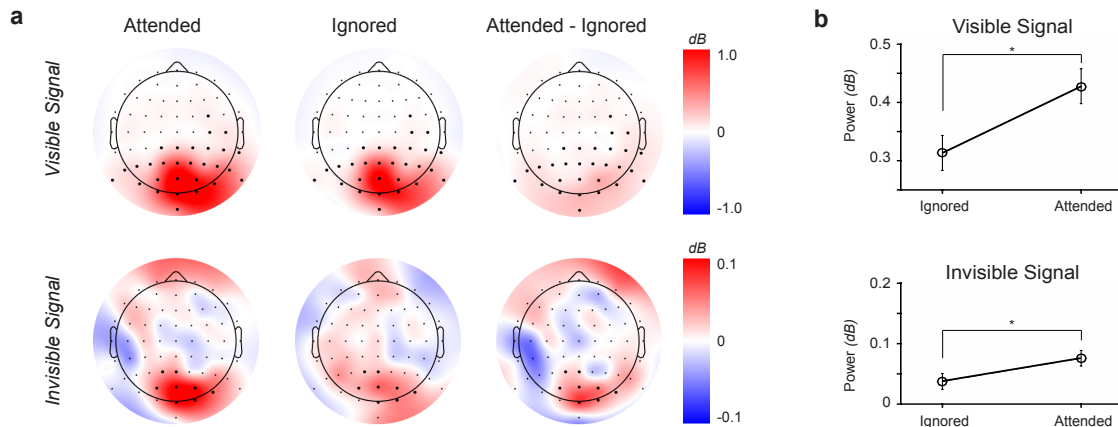

345

346 **Figure 8.** Effect of attention on neural responses to visible (top) and invisible (bottom) signals in the  
347 Attention Task. (a) Electrode power topographies for attended signals (left), ignored signals (middle),  
348 and the difference between attended and ignored signals (right). Topographies are contralateralized  
349 to represent left side stimulation, and collapsed across signal frequencies (5 and 7.5 Hz) Larger dots  
350 indicate electrodes showing significant signal (Figure 7), across which power was collapsed to  
351 investigate the effect of attention. (b) Effect of attention within each level of awareness, collapsed  
352 across electrodes showing significant signal. Attention significantly increased the neural response to  
353 both visible and invisible signals ( $p < .05$ ).

## 354 Discussion

355 Previous research has suggested that covert spatial attention can modulate neural responses to  
356 invisible stimuli, supporting the notion that attention and awareness are dissociable neural  
357 processes (Wyart and Tallon-Baudry, 2008; Watanabe et al., 2011; Wyart et al., 2012a).  
358 Nevertheless, the intricacies of such a relationship remain poorly understood, such as whether  
359 covert spatial attention can modulate neural representations of invisible stimuli that are in  
360 spatial competition with highly salient noise. To investigate this question, we developed a  
361 novel attention task in which participants counted the number of brief contrast decreases in one  
362 of two image streams that contained both signals (visible or invisible) and noise. We isolated  
363 neural responses to noise in cued (attended) and non-cued (ignored) image streams, and  
364 observed enhanced activity across contralateral and posterior electrodes to cued noise  
365 throughout the trial epoch, confirming that participants voluntarily held their attention to one  
366 of the two lateralized image streams as instructed. Neural responses to noise were also  
367 enhanced across central electrodes with correct identification of contrast targets, suggesting  
368 that fluctuations in attention across trials directly affected target detection.

369 We employed a novel frequency tagging approach that allowed us to isolate neural responses  
370 to visible and invisible signals embedded in highly salient noise. To our knowledge, this is the  
371 first study to report SSVEP responses to invisible stimuli. This finding indicates that awareness

372 of a stimulus is not a prerequisite for eliciting an SSVEP, as might be inferred from the step-  
373 like rise in SSVEP power that coincided with the onset of signal awareness in a previous study  
374 (Ales et al., 2012). Instead, our findings demonstrate that SSVEPs track intermediate levels of  
375 signal strength, even at levels too weak to provoke conscious perception.

376 Critically, our paradigm allowed us to measure the effects of spatial attention on neural  
377 responses to visible and invisible signals. We found that neural responses to visible signals  
378 were greater in the attended image stream than in the ignored stream, extending previous  
379 findings of enhanced neural responses to attended visible stimuli (Hillyard and Anllo-Vento,  
380 1998; Müller et al., 1998; Martinez et al., 1999) to demonstrate that spatial attention also  
381 benefits partially degraded, yet still visible, signals in spatial competition with clearly visible  
382 and highly salient noise. Crucially, neural responses to invisible signals were also greater in  
383 the attended image stream than in the ignored stream, demonstrating that spatial attention  
384 enhances representations of invisible stimuli in direct spatial competition with highly salient  
385 and visible noise. Since spatial attention enhanced neural representations of signals without a  
386 corresponding increase in signal awareness, the present findings support the notion that spatial  
387 attention and awareness are dissociable neural mechanisms (Dehaene et al., 2006; Cohen et al.,  
388 2012; Koch and Tsuchiya, 2012; Tallon-Baudry, 2012).

389 Although the present study is not the first to demonstrate effects of spatial attention in the  
390 absence of object awareness (Schurger et al., 2008; Wyart and Tallon-Baudry, 2008; Watanabe  
391 et al., 2011; Wyart et al., 2012a), it makes several important advances on the existing literature.  
392 First, previous studies have not demonstrated that the observed neural activity, modulated by  
393 attention, was specifically related to the invisible stimuli in question. As such, the observed  
394 effects of attention may instead reflect enhanced neural representations of other, visible stimuli  
395 (such as the spatial cue in Wyart et al., 2012a), as has been argued elsewhere (Cohen et al.,  
396 2012). Alternatively, previously reported effects may have reflected subcomponents of spatial  
397 attention that do not modulate neural representations *per se* (for a review on the various  
398 subcomponents of attention, see Womelsdorf and Everling, 2015). For example, the effects  
399 observed in studies using probabilistic cues (Schurger et al., 2008; Wyart and Tallon-Baudry,  
400 2008; Wyart et al., 2012b) could reflect re-orienting of attention after a miscued stimulus.  
401 Consistent with this interpretation, two such studies reported late effects of spatial attention  
402 (350 – 500 ms; Schurger et al., 2008; Wyart and Tallon-Baudry, 2008) that seem inconsistent  
403 with the earlier effects reported elsewhere (beginning at 100 ms post-stimulus; Eimer, 1995).



404 In addition, previously observed effects of spatial attention could reflect baseline shifts in  
405 neuronal activity that occur even in the absence of external driving stimuli (Driver and Frith,  
406 2000), as opposed to modulation of neural representations of invisible stimuli *per se*. In  
407 demonstrating that spatial attention modulates specific neural correlates of invisible stimuli,  
408 without a corresponding increase in awareness, the present study provides the first clear  
409 evidence that spatial attention and awareness dissociate at the level of neuronal representations.

410 Second, previous studies have presented signals at detection threshold and used participants'  
411 subjective reports to categorise trials according to visibility (e.g. Wyart et al., 2012a). In such  
412 paradigms, invisible signals are presented at the same intensity as visible signals (i.e. with  
413 enough bottom-up strength that they have the potential to enter awareness) and thus it remains  
414 possible that surpassing some minimum 'threshold' of activation might be required for neural  
415 representations to elicit effects of spatial attention. In contrast, we presented visible and  
416 invisible signals at different, pre-determined levels of coherence, and verified that invisible  
417 stimuli were objectively undetectable with a two-interval forced-choice signal detection task.  
418 Thus, we can be confident that invisible signals in our experiment were weaker than any  
419 hypothetical 'threshold' required for them to enter awareness, and that surpassing such a  
420 threshold is not a necessary requirement for neural representations to be affected by spatial  
421 attention. It could be argued that since we did not measure signal awareness during the  
422 Attention Task, participants might have been aware of the 'invisible' signal. Although we  
423 cannot rule this out, we argue that such a scenario is unlikely, considering that participants  
424 actively searched for signals in the Awareness Task, but looked instead for contrast decrements  
425 during the Attention Task.

426 A third, and arguably most important, advance of the current study is that we have shown that  
427 spatial attention can enhance neural representations of invisible stimuli that are in direct spatial  
428 competition with highly salient, visible stimuli. Previous studies presented invisible signals  
429 alone (Schurger et al., 2008; Wyart and Tallon-Baudry, 2008), or at different times or locations  
430 (Watanabe et al., 2011; Wyart et al., 2012a) to the salient masks used to titrate signal awareness.  
431 Since neural competition is maximal at the level of the receptive field (Reynolds et al., 1999;  
432 Beck and Kastner, 2009), neural representations of invisible signals in these studies were likely  
433 under conditions of minimal competition. In contrast, we maximised competition between  
434 signal and noise by presenting them concurrently and at the same location. Our findings reveal  
435 concurrent neural representations of both visible and invisible stimuli at the same location,

436 demonstrating that spatial competition with highly salient stimuli is not sufficient to suppress  
437 weak neural representations of invisible stimuli. Moreover, the present study demonstrates that  
438 weak neural representations of invisible stimuli in competition with salient stimuli can  
439 nevertheless be biased according to the top-down goals of the observer – in this case, holding  
440 covert attention preferentially to the left or right visual field. Given that signal features were  
441 irrelevant to the contrast detection task, this finding suggests that all stimuli within the  
442 ‘spotlight’ of spatial attention are prioritised relative to those at unattended locations (Posner,  
443 1980), irrespective of their task-relevance, their capacity to enter awareness, or their proximity  
444 to more salient stimuli.

445 Although previous studies have generally found that SSVEPs originate in primary visual  
446 cortex, other studies have localized sources of low-frequency SSVEPs to medial frontal  
447 cortices and even subcortical areas (Norcia et al., 2015). We observed posterior and  
448 contralateral patterns of scalp activity in response to the signal, consistent with sources in  
449 retinotopically organized primary visual cortex (Serenio et al., 1995; Engel et al., 1997). Thus,  
450 our findings suggest that attention modulates neural responses to invisible stimuli in early  
451 visual cortex. Whether attention can also modulate neural responses to invisible stimuli in  
452 hierarchically lower (subcortical) or higher (medial frontal) visual areas is beyond the scope of  
453 the present study, but remains an important question for future research.

454 The present findings demonstrate that spatial attention can operate independent of mechanisms  
455 of awareness, at the level of neural representations. More broadly, the present findings place  
456 spatial attention within a growing body of literature that suggests various forms of attention  
457 (e.g., temporal, feature-based, and involuntary spatial attention) can operate in the absence of  
458 stimulus awareness (for a review, see Koch and Tsuchiya, 2007). Together, these findings  
459 argue against the idea that attention and awareness are identical (Prinz, 2012) and instead  
460 support theories that cast attention and awareness as dissociable mechanisms (Dehaene et al.,  
461 2006; Cohen et al., 2012; Koch and Tsuchiya, 2012; Tallon-Baudry, 2012). Nevertheless, the  
462 exact nature of this relationship remains to be fully characterized, in particular whether the  
463 different forms of attention interact with awareness according to the same underlying  
464 principles, and how such top-down biases interact with bottom-up processes related to salience  
465 and neural competition between representations. To this end, we anticipate that the present  
466 paradigm could be adapted to study how other non-spatial forms of attention (e.g., feature-

467 based) modulate neural representations of multiple competing stimuli at different levels of  
468 awareness.

## 469 **References**

- 470 Ales JM, Farzin F, Rossion B, Norcia AM (2012) An objective method for measuring face detection thresholds  
471 using the sweep steady-state visual evoked response. *J Vis* 12:1–18.
- 472 Beck DM, Kastner S (2009) Top-down and bottom-up mechanisms in biasing competition in the human brain.  
473 *Vision Res* 49:1154–1165 Available at: <http://dx.doi.org/10.1016/j.visres.2008.07.012>.
- 474 Broadbent DE (1958) *Perception and Communication*. Oxford: Pergamon Press.
- 475 Cohen M (2014) *Analyzing Neural Time Series Data*. Cambridge, MA: MIT Press.
- 476 Cohen MA, Cavanagh P, Chun MM, Nakayama K (2012) The attentional requirements of consciousness.  
477 *Trends Cogn Sci* 16:411–417 Available at: <http://dx.doi.org/10.1016/j.tics.2012.06.013>.
- 478 Dehaene S, Changeux J-P, Naccache L, Sackur J, Sergent C (2006) Conscious, preconscious, and subliminal  
479 processing: A testable taxonomy. *Trends Cogn Sci* 10:204–211 Available at:  
480 <http://linkinghub.elsevier.com/retrieve/pii/S1364661306000799>.
- 481 Desimone R, Duncan J (1995) Neural mechanisms of selective visual attention. *Annu Rev Neurosci* 18:193–  
482 222.
- 483 Driver J, Frith C (2000) Shifting baselines in attention research. *Nat Rev Neurosci* 1:147–148.
- 484 Eimer M (1995) Event-related potential correlates of transient attention shifts to colour and location. *Biol*  
485 *Psychol* 41:167–182.
- 486 Engel SA, Glover GH, Wandell BA (1997) Retinotopic organization in human visual cortex and the spatial  
487 precision of functional MRI. *Cereb Cortex* 7:181–192.
- 488 Hillyard SA, Anllo-Vento L (1998) Event-related brain potentials in the study of visual selective attention. *Proc*  
489 *Natl Acad Sci U S A* 95:781–787 Available at: <http://www.pnas.org/content/95/3/781.short>.
- 490 Koch C, Tsuchiya N (2007) Attention and consciousness: Two distinct brain processes. *Trends Cogn Sci* 11:16–  
491 22 Available at: <http://linkinghub.elsevier.com/retrieve/pii/S1364661306003032>.
- 492 Koch C, Tsuchiya N (2012) Attention and consciousness: Related yet different. *Trends Cogn Sci* 16:103–104  
493 Available at: <http://dx.doi.org/10.1016/j.tics.2011.11.012>.
- 494 Maris E, Oostenveld R (2007) Nonparametric statistical testing of EEG- and MEG-data. *J Neurosci Methods*  
495 164:177–190.
- 496 Martinez A, Anllo-Vento L, Sereno MI, Frank LR, Buxton RB, Dubowitz DJ, Wong EC, Hinrichs H, Heinze  
497 HJ, Hillyard SA (1999) Involvement of striate and extrastriate visual cortical areas in spatial attention. *Nat*  
498 *Neurosci* 2:364–369 Available at: [http://www.nature.com/neuro/journal/v2/n4/abs/nn0499\\_364.html](http://www.nature.com/neuro/journal/v2/n4/abs/nn0499_364.html).
- 499 Müller MM, Picton TW, Valdes-Sosa P, Riera J, Teder-Sälejärvi WA, Hillyard SA (1998) Effects of spatial  
500 selective attention on the steady-state visual evoked potential in the 20 – 28 Hz range. *Cogn Brain Res*  
501 6:249–261.
- 502 Norcia AM, Appelbaum LG, Ales JM, Cottareau BR, Rossion B (2015) The steady-state visual evoked potential  
503 in vision research: A review. *J Vis* 15:1–46.
- 504 Posner MI (1980) Orienting of attention. *Q J Exp Psychol* 32:3–25.

- 505 Prinz JJ (2012) The conscious brain: How attention engenders experience.
- 506 Regan D (1966) Some characteristics of average steady-state and transient responses evoked by modulated light.  
507 Electroencephalogr Clin Neurophysiol 20:238–248.
- 508 Reynolds JH, Chelazzi L, Desimone R (1999) Competitive mechanisms subserve attention in macaque areas V2  
509 and V4. J Neurosci 19:1736–1753.
- 510 Ridderinkhof KR (2004) The Role of the Medial Frontal Cortex in Cognitive Control. Science (80- ) 306:443–  
511 447.
- 512 Schurger A, Cowey A, Cohen JD, Treisman A, Tallon-Baudry C (2008) Distinct and independent correlates of  
513 attention and awareness in a hemianopic patient. Neuropsychologia 46:2189–2197 Available at:  
514 <http://www.ncbi.nlm.nih.gov/pubmed/18396301>.
- 515 Sereno MI, Dale AM, Reppas JB, Kwong KK, Belliveau JW, Brady TJ, Rosen BR, Tootell RB (1995) Borders  
516 of multiple visual areas in humans revealed by functional magnetic resonance imaging. Science 268:889–  
517 893 Available at: <http://www.ncbi.nlm.nih.gov/pubmed/7754376>.
- 518 Tallon-Baudry C (2012) On the neural mechanisms subserving consciousness and attention. Front Psychol 3:1–  
519 11.
- 520 Vialatte F-B, Maurice M, Dauwels J, Cichocki A (2010) Steady-state visually evoked potentials: Focus on  
521 essential paradigms and future perspectives. Prog Neurobiol 90:418–438 Available at:  
522 <http://www.sciencedirect.com/science/article/pii/S0301008209001853>.
- 523 Watanabe M, Cheng K, Murayama Y, Ueno K, Asamizuya T, Tanaka K, Logothetis N (2011) Attention but not  
524 awareness modulates the BOLD signal in the human V1 during binocular suppression. Science (80- )  
525 334:829–831 Available at: <http://www.sciencemag.org/cgi/doi/10.1126/science.1203161>.
- 526 Watson AB, Pelli DG (1983) QUEST: A Bayesian adaptive psychometric method. Percept Psychophys 33:113–  
527 120.
- 528 Womelsdorf T, Everling S (2015) Long-range attention networks: Circuit motifs underlying endogenously  
529 controlled stimulus selection. Trends Neurosci 38:682–700 Available at:  
530 <http://dx.doi.org/10.1016/j.tins.2015.08.009>.
- 531 Wyart V, Dehaene S, Tallon-Baudry C (2012a) Early dissociation between neural signatures of endogenous  
532 spatial attention and perceptual awareness during visual masking. Front Hum Neurosci 6:1–14 Available  
533 at: <http://www.ncbi.nlm.nih.gov/pmc/articles/PMC3277271/pdf/fnhum-06-00016.pdf>.
- 534 Wyart V, Nobre AC, Summerfield C (2012b) Dissociable prior influences of signal probability and relevance on  
535 visual contrast sensitivity. Proc Natl Acad Sci 109:3593–3598.
- 536 Wyart V, Tallon-Baudry C (2008) Neural dissociation between visual awareness and spatial attention. J  
537 Neurosci 28:2667–2679 Available at: [http://www.jneurosci.org/cgi/doi/10.1523/JNEUROSCI.4748-](http://www.jneurosci.org/cgi/doi/10.1523/JNEUROSCI.4748-07.2008)  
538 07.2008.

## 539 **Supplemental Media**

540 **Movie 1.** Example trial of the Awareness Task. At the beginning of the trial, static noise images  
541 appear on either side of fixation, and central arrows indicate the image stream to be attended (in this  
542 example, the left stream). After 0.5 s the image streams flicker for the first 2.4 s interval, are static for  
543 another 0.5 s, and then flicker again for the second 2.4 s interval. On the cued (left) side, one of the  
544 two flickering intervals contains signal embedded in every second image (in this example, the second  
545 interval), the coherence of which increases linearly during the first 0.4 s of the interval. Signal is also  
546 present in one of the two intervals on the non-cued (right) side (in this example, the first interval).

547 **Movie 2.** Example trial of the Attention Task. At the beginning of the trial, static noise images appear  
548 on either side of fixation, and central arrows indicate the image stream to be attended (in this  
549 example, the left stream). After 0.5 s the image streams flicker for 10.4 s. At the end of the trial  
550 participants report how many times the cued (left) image stream decreased in contrast (in this  
551 example, twice). The non-cued image stream also contains up to two contrast decrements (two in this  
552 example). Both image streams contain signal embedded in every second image, the coherence of  
553 which increases linearly during the first 0.4 s of flicker to a level that is either visible or invisible to the  
554 participant (in this example, the left image stream contains visible signal and the right image stream  
555 contains invisible signal).
